# Supplementary material
Source: MDPI journal article supplement (https://www.mdpi.com/2225-1154/11/11/223)
Supplement: s1 [file s1]

## Supplementary Material

**Table S1.** Parameter estimates for generalized linear models analyzing the relationship between regional > EF0 tornado frequency and tri-monthly climate indices. Bold indicates significant values ( $\alpha < 0.05$ ).

| EUS April |  |  |  |  |  |  |  |  |  |
|-----------|--|--|--|--|--|--|--|--|--|
|           |  |  |  |  |  |  |  |  |  |
|           |  |  |  |  |  |  |  |  |  |
|           |  |  |  |  |  |  |  |  |  |
|           |  |  |  |  |  |  |  |  |  |
|           |  |  |  |  |  |  |  |  |  |
|           |  |  |  |  |  |  |  |  |  |
|           |  |  |  |  |  |  |  |  |  |
|           |  |  |  |  |  |  |  |  |  |
|           |  |  |  |  |  |  |  |  |  |
|           |  |  |  |  |  |  |  |  |  |
|           |  |  |  |  |  |  |  |  |  |
|           |  |  |  |  |  |  |  |  |  |
|           |  |  |  |  |  |  |  |  |  |
|           |  |  |  |  |  |  |  |  |  |
|           |  |  |  |  |  |  |  |  |  |
|           |  |  |  |  |  |  |  |  |  |
|           |  |  |  |  |  |  |  |  |  |
|           |  |  |  |  |  |  |  |  |  |
|           |  |  |  |  |  |  |  |  |  |
|           |  |  |  |  |  |  |  |  |  |
|           |  |  |  |  |  |  |  |  |  |
|           |  |  |  |  |  |  |  |  |  |
|           |  |  |  |  |  |  |  |  |  |
|           |  |  |  |  |  |  |  |  |  |
|           |  |  |  |  |  |  |  |  |  |
|           |  |  |  |  |  |  |  |  |  |
|           |  |  |  |  |  |  |  |  |  |
|           |  |  |  |  |  |  |  |  |  |
|           |  |  |  |  |  |  |  |  |  |
|           |  |  |  |  |  |  |  |  |  |
|           |  |  |  |  |  |  |  |  |  |
|           |  |  |  |  |  |  |  |  |  |
|           |  |  |  |  |  |  |  |  |  |
|           |  |  |  |  |  |  |  |  |  |
|           |  |  |  |  |  |  |  |  |  |
|           |  |  |  |  |  |  |  |  |  |
|           |  |  |  |  |  |  |  |  |  |
|           |  |  |  |  |  |  |  |  |  |
|           |  |  |  |  |  |  |  |  |  |
|           |  |  |  |  |  |  |  |  |  |
|           |  |  |  |  |  |  |  |  |  |
|           |  |  |  |  |  |  |  |  |  |
|           |  |  |  |  |  |  |  |  |  |
|           |  |  |  |  |  |  |  |  |  |
|           |  |  |  |  |  |  |  |  |  |
|           |  |  |  |  |  |  |  |  |  |
|           |  |  |  |  |  |  |  |  |  |
|           |  |  |  |  |  |  |  |  |  |
|           |  |  |  |  |  |  |  |  |  |
|           |  |  |  |  |  |  |  |  |  |
|           |  |  |  |  |  |  |  |  |  |
|           |  |  |  |  |  |  |  |  |  |
|           |  |  |  |  |  |  |  |  |  |
|           |  |  |  |  |  |  |  |  |  |
|           |  |  |  |  |  |  |  |  |  |
|           |  |  |  |  |  |  |  |  |  |
|           |  |  |  |  |  |  |  |  |  |
|           |  |  |  |  |  |  |  |  |  |
|           |  |  |  |  |  |  |  |  |  |
|           |  |  |  |  |  |  |  |  |  |
|           |  |  |  |  |  |  |  |  |  |
|           |  |  |  |  |  |  |  |  |  |
|           |  |  |  |  |  |  |  |  |  |
|           |  |  |  |  |  |  |  |  |  |
|           |  |  |  |  |  |  |  |  |  |
|           |  |  |  |  |  |  |  |  |  |
|           |  |  |  |  |  |  |  |  |  |
|           |  |  |  |  |  |  |  |  |  |
|           |  |  |  |  |  |  |  |  |  |
|           |  |  |  |  |  |  |  |  |  |
|           |  |  |  |  |  |  |  |  |  |
|           |  |  |  |  |  |  |  |  |  |
|           |  |  |  |  |  |  |  |  |  |
|           |  |  |  |  |  |  |  |  |  |
|           |  |  |  |  |  |  |  |  |  |
|           |  |  |  |  |  |  |  |  |  |
|           |  |  |  |  |  |  |  |  |  |
|           |  |  |  |  |  |  |  |  |  |
|           |  |  |  |  |  |  |  |  |  |
|           |  |  |  |  |  |  |  |  |  |
|           |  |  |  |  |  |  |  |  |  |
|           |  |  |  |  |  |  |  |  |  |
|           |  |  |  |  |  |  |  |  |  |
|           |  |  |  |  |  |  |  |  |  |
|           |  |  |  |  |  |  |  |  |  |
|           |  |  |  |  |  |  |  |  |  |
|           |  |  |  |  |  |  |  |  |  |
|           |  |  |  |  |  |  |  |  |  |
|           |  |  |  |  |  |  |  |  |  |
|           |  |  |  |  |  |  |  |  |  |
|           |  |  |  |  |  |  |  |  |  |
|           |  |  |  |  |  |  |  |  |  |
|           |  |  |  |  |  |  |  |  |  |
|           |  |  |  |  |  |  |  |  |  |
|           |  |  |  |  |  |  |  |  |  |
|           |  |  |  |  |  |  |  |  |  |
|           |  |  |  |  |  |  |  |  |  |
|           |  |  |  |  |  |  |  |  |  |
|           |  |  |  |  |  |  |  |  |  |
|           |  |  |  |  |  |  |  |  |  |
|           |  |  |  |  |  |  |  |  |  |
|           |  |  |  |  |  |  |  |  |  |
|           |  |  |  |  |  |  |  |  |  |
|           |  |  |  |  |  |  |  |  |  |
|           |  |  |  |  |  |  |  |  |  |
|           |  |  |  |  |  |  |  |  |  |
|           |  |  |  |  |  |  |  |  |  |
|           |  |  |  |  |  |  |  |  |  |
|           |  |  |  |  |  |  |  |  |  |
|           |  |  |  |  |  |  |  |  |  |
|           |  |  |  |  |  |  |  |  |  |
|           |  |  |  |  |  |  |  |  |  |
|           |  |  |  |  |  |  |  |  |  |
|           |  |  |  |  |  |  |  |  |  |
|           |  |  |  |  |  |  |  |  |  |
|           |  |  |  |  |  |  |  |  |  |
|           |  |  |  |  |  |  |  |  |  |
|           |  |  |  |  |  |  |  |  |  |
|           |  |  |  |  |  |  |  |  |  |
|           |  |  |  |  |  |  |  |  |  |
|           |  |  |  |  |  |  |  |  |  |
|           |  |  |  |  |  |  |  |  |  |
|           |  |  |  |  |  |  |  |  |  |
|           |  |  |  |  |  |  |  |  |  |
|           |  |  |  |  |  |  |  |  |  |
|           |  |  |  |  |  |  |  |  |  |
|           |  |  |  |  |  |  |  |  |  |
|           |  |  |  |  |  |  |  |  |  |
|           |  |  |  |  |  |  |  |  |  |
|           |  |  |  |  |  |  |  |  |  |
|           |  |  |  |  |  |  |  |  |  |
|           |  |  |  |  |  |  |  |  |  |
|           |  |  |  |  |  |  |  |  |  |
|           |  |  |  |  |  |  |  |  |  |
|           |  |  |  |  |  |  |  |  |  |
|           |  |  |  |  |  |  |  |  |  |
|           |  |  |  |  |  |  |  |  |  |
|           |  |  |  |  |  |  |  |  |  |
|           |  |  |  |  |  |  |  |  |  |
|           |  |  |  |  |  |  |  |  |  |
|           |  |  |  |  |  |  |  |  |  |
|           |  |  |  |  |  |  |  |  |  |
|           |  |  |  |  |  |  |  |  |  |
|           |  |  |  |  |  |  |  |  |  |
|           |  |  |  |  |  |  |  |  |  |
|           |  |  |  |  |  |  |  |  |  |
|           |  |  |  |  |  |  |  |  |  |
|           |  |  |  |  |  |  |  |  |  |
|           |  |  |  |  |  |  |  |  |  |
|           |  |  |  |  |  |  |  |  |  |
|           |  |  |  |  |  |  |  |  |  |
|           |  |  |  |  |  |  |  |  |  |
|           |  |  |  |  |  |  |  |  |  |
|           |  |  |  |  |  |  |  |  |  |
|           |  |  |  |  |  |  |  |  |  |
|           |  |  |  |  |  |  |  |  |  |
|           |  |  |  |  |  |  |  |  |  |
|           |  |  |  |  |  |  |  |  |  |
|           |  |  |  |  |  |  |  |  |  |
|           |  |  |  |  |  |  |  |  |  |
|           |  |  |  |  |  |  |  |  |  |
|           |  |  |  |  |  |  |  |  |  |
|           |  |  |  |  |  |  |  |  |  |
|           |  |  |  |  |  |  |  |  |  |
|           |  |  |  |  |  |  |  |  |  |
|           |  |  |  |  |  |  |  |  |  |
|           |  |  |  |  |  |  |  |  |  |
|           |  |  |  |  |  |  |  |  |  |
|           |  |  |  |  |  |  |  |  |  |
|           |  |  |  |  |  |  |  |  |  |
|           |  |  |  |  |  |  |  |  |  |
|           |  |  |  |  |  |  |  |  |  |
|           |  |  |  |  |  |  |  |  |  |
|           |  |  |  |  |  |  |  |  |  |
|           |  |  |  |  |  |  |  |  |  |
|           |  |  |  |  |  |  |  |  |  |
|           |  |  |  |  |  |  |  |  |  |
|           |  |  |  |  |  |  |  |  |  |
|           |  |  |  |  |  |  |  |  |  |
|           |  |  |  |  |  |  |  |  |  |
|           |  |  |  |  |  |  |  |  |  |
|           |  |  |  |  |  |  |  |  |  |
|           |  |  |  |  |  |  |  |  |  |
|           |  |  |  |  |  |  |  |  |  |
|           |  |  |  |  |  |  |  |  |  |
|           |  |  |  |  |  |  |  |  |  |
|           |  |  |  |  |  |  |  |  |  |
|           |  |  |  |  |  |  |  |  |  |
|           |  |  |  |  |  |  |  |  |  |
|           |  |  |  |  |  |  |  |  |  |
|           |  |  |  |  |  |  |  |  |  |
|           |  |  |  |  |  |  |  |  |  |
|           |  |  |  |  |  |  |  |  |  |
|           |  |  |  |  |  |  |  |  |  |
|           |  |  |  |  |  |  |  |  |  |
|           |  |  |  |  |  |  |  |  |  |
|           |  |  |  |  |  |  |  |  |  |
|           |  |  |  |  |  |  |  |  |  |
|           |  |  |  |  |  |  |  |  |  |
|           |  |  |  |  |  |  |  |  |  |
|           |  |  |  |  |  |  |  |  |  |
|           |  |  |  |  |  |  |  |  |  |
|           |  |  |  |  |  |  |  |  |  |
|           |  |  |  |  |  |  |  |  |  |
|           |  |  |  |  |  |  |  |  |  |
|           |  |  |  |  |  |  |  |  |  |
|           |  |  |  |  |  |  |  |  |  |
|           |  |  |  |  |  |  |  |  |  |
|           |  |  |  |  |  |  |  |  |  |
|           |  |  |  |  |  |  |  |  |  |
|           |  |  |  |  |  |  |  |  |  |
|           |  |  |  |  |  |  |  |  |  |
|           |  |  |  |  |  |  |  |  |  |
|           |  |  |  |  |  |  |  |  |  |
|           |  |  |  |  |  |  |  |  |  |
|           |  |  |  |  |  |  |  |  |  |
|           |  |  |  |  |  |  |  |  |  |
|           |  |  |  |  |  |  |  |  |  |
|           |  |  |  |  |  |  |  |  |  |
|           |  |  |  |  |  |  |  |  |  |
|           |  |  |  |  |  |  |  |  |  |
|           |  |  |  |  |  |  |  |  |  |
|           |  |  |  |  |  |  |  |  |  |
|           |  |  |  |  |  |  |  |  |  |
|           |  |  |  |  |  |  |  |  |  |
|           |  |  |  |  |  |  |  |  |  |
|           |  |  |  |  |  |  |  |  |  |
|           |  |  |  |  |  |  |  |  |  |
|           |  |  |  |  |  |  |  |  |  |
|           |  |  |  |  |  |  |  |  |  |
|           |  |  |  |  |  |  |  |  |  |
|           |  |  |  |  |  |  |  |  |  |
|           |  |  |  |  |  |  |  |  |  |
|           |  |  |  |  |  |  |  |  |  |
|           |  |  |  |  |  |  |  |  |  |
|           |  |  |  |  |  |  |  |  |  |
|           |  |  |  |  |  |  |  |  |  |
|           |  |  |  |  |  |  |  |  |  |
|           |  |  |  |  |  |  |  |  |  |
|           |  |  |  |  |  |  |  |  |  |
|           |  |  |  |  |  |  |  |  |  |
|           |  |  |  |  |  |  |  |  |  |
|           |  |  |  |  |  |  |  |  |  |
|           |  |  |  |  |  |  |  |  |  |
|           |  |  |  |  |  |  |  |  |  |
|           |  |  |  |  |  |  |  |  |  |
|           |  |  |  |  |  |  |  |  |  |
|           |  |  |  |  |  |  |  |  |  |
|           |  |  |  |  |  |  |  |  |  |
|           |  |  |  |  |  |  |  |  |  |
|           |  |  |  |  |  |  |  |  |  |
|           |  |  |  |  |  |  |  |  |  |
|           |  |  |  |  |  |  |  |  |  |
|           |  |  |  |  |  |  |  |  |  |
|           |  |  |  |  |  |  |  |  |  |
|           |  |  |  |  |  |  |  |  |  |
|           |  |  |  |  |  |  |  |  |  |
|           |  |  |  |  |  |  |  |  |  |
|           |  |  |  |  |  |  |  |  |  |
|           |  |  |  |  |  |  |  |  |  |
|           |  |  |  |  |  |  |  |  |  |
|           |  |  |  |  |  |  |  |  |  |
|           |  |  |  |  |  |  |  |  |  |
|           |  |  |  |  |  |  |  |  |  |
|           |  |  |  |  |  |  |  |  |  |
|           |  |  |  |  |  |  |  |  |  |
|           |  |  |  |  |  |  |  |  |  |
|           |  |  |  |  |  |  |  |  |  |
|           |  |  |  |  |  |  |  |  |  |
|           |  |  |  |  |  |  |  |  |  |
|           |  |  |  |  |  |  |  |  |  |
|           |  |  |  |  |  |  |  |  |  |
|           |  |  |  |  |  |  |  |  |  |
|           |  |  |  |  |  |  |  |  |  |
|           |  |  |  |  |  |  |  |  |  |
|           |  |  |  |  |  |  |  |  |  |
|           |  |  |  |  |  |  |  |  |  |
|           |  |  |  |  |  |  |  |  |  |
|           |  |  |  |  |  |  |  |  |  |
|           |  |  |  |  |  |  |  |  |  |
|           |  |  |  |  |  |  |  |  |  |
|           |  |  |  |  |  |  |  |  |  |
|           |  |  |  |  |  |  |  |  |  |
|           |  |  |  |  |  |  |  |  |  |
|           |  |  |  |  |  |  |  |  |  |
|           |  |  |  |  |  |  |  |  |  |
|           |  |  |  |  |  |  |  |  |  |
|           |  |  |  |  |  |  |  |  |  |
|           |  |  |  |  |  |  |  |  |  |
|           |  |  |  |  |  |  |  |  |  |
|           |  |  |  |  |  |  |  |  |  |
|           |  |  |  |  |  |  |  |  |  |
|           |  |  |  |  |  |  |  |  |  |
|           |  |  |  |  |  |  |  |  |  |
|           |  |  |  |  |  |  |  |  |  |
|           |  |  |  |  |  |  |  |  |  |
|           |  |  |  |  |  |  |  |  |  |
|           |  |  |  |  |  |  |  |  |  |
|           |  |  |  |  |  |  |  |  |  |
|           |  |  |  |  |  |  |  |  |  |
|           |  |  |  |  |  |  |  |  |  |
|           |  |  |  |  |  |  |  |  |  |
|           |  |  |  |  |  |  |  |  |  |
|           |  |  |  |  |  |  |  |  |  |
|           |  |  |  |  |  |  |  |  |  |
|           |  |  |  |  |  |  |  |  |  |
|           |  |  |  |  |  |  |  |  |  |
|           |  |  |  |  |  |  |  |  |  |
|           |  |  |  |  |  |  |  |  |  |
|           |  |  |  |  |  |  |  |  |  |
|           |  |  |  |  |  |  |  |  |  |
|           |  |  |  |  |  |  |  |  |  |
|           |  |  |  |  |  |  |  |  |  |
|           |  |  |  |  |  |  |  |  |  |
|           |  |  |  |  |  |  |  |  |  |
|           |  |  |  |  |  |  |  |  |  |
|           |  |  |  |  |  |  |  |  |  |
|           |  |  |  |  |  |  |  |  |  |
|           |  |  |  |  |  |  |  |  |  |
|           |  |  |  |  |  |  |  |  |  |
|           |  |  |  |  |  |  |  |  |  |
|           |  |  |  |  |  |  |  |  |  |
|           |  |  |  |  |  |  |  |  |  |
|           |  |  |  |  |  |  |  |  |  |
|           |  |  |  |  |  |  |  |  |  |
|           |  |  |  |  |  |  |  |  |  |
|           |  |  |  |  |  |  |  |  |  |
|           |  |  |  |  |  |  |  |  |  |
|           |  |  |  |  |  |  |  |  |  |
|           |  |  |  |  |  |  |  |  |  |
|           |  |  |  |  |  |  |  |  |  |
|           |  |  |  |  |  |  |  |  |  |
|           |  |  |  |  |  |  |  |  |  |
|           |  |  |  |  |  |  |  |  |  |
|           |  |  |  |  |  |  |  |  |  |
|           |  |  |  |  |  |  |  |  |  |
|           |  |  |  |  |  |  |  |  |  |
|           |  |  |  |  |  |  |  |  |  |
|           |  |  |  |  |  |  |  |  |  |
|           |  |  |  |  |  |  |  |  |  |
|           |  |  |  |  |  |  |  |  |  |
|           |  |  |  |  |  |  |  |  |  |
|           |  |  |  |  |  |  |  |  |  |
|           |  |  |  |  |  |  |  |  |  |
|           |  |  |  |  |  |  |  |  |  |
|           |  |  |  |  |  |  |  |  |  |
|           |  |  |  |  |  |  |  |  |  |
|           |  |  |  |  |  |  |  |  |  |
|           |  |  |  |  |  |  |  |  |  |
|           |  |  |  |  |  |  |  |  |  |
|           |  |  |  |  |  |  |  |  |  |
|           |  |  |  |  |  |  |  |  |  |
|           |  |  |  |  |  |  |  |  |  |
|           |  |  |  |  |  |  |  |  |  |
|           |  |  |  |  |  |  |  |  |  |
|           |  |  |  |  |  |  |  |  |  |
|           |  |  |  |  |  |  |  |  |  |
|           |  |  |  |  |  |  |  |  |  |
|           |  |  |  |  |  |  |  |  |  |
|           |  |  |  |  |  |  |  |  |  |
|           |  |  |  |  |  |  |  |  |  |
|           |  |  |  |  |  |  |  |  |  |
|           |  |  |  |  |  |  |  |  |  |
|           |  |  |  |  |  |  |  |  |  |
|           |  |  |  |  |  |  |  |  |  |
|           |  |  |  |  |  |  |  |  |  |
|           |  |  |  |  |  |  |  |  |  |
|           |  |  |  |  |  |  |  |  |  |
|           |  |  |  |  |  |  |  |  |  |
|           |  |  |  |  |  |  |  |  |  |
|           |  |  |  |  |  |  |  |  |  |
|           |  |  |  |  |  |  |  |  |  |
|           |  |  |  |  |  |  |  |  |  |
|           |  |  |  |  |  |  |  |  |  |
|           |  |  |  |  |  |  |  |  |  |
|           |  |  |  |  |  |  |  |  |  |
|           |  |  |  |  |  |  |  |  |  |
|           |  |  |  |  |  |  |  |  |  |
|           |  |  |  |  |  |  |  |  |  |
|           |  |  |  |  |  |  |  |  |  |
|           |  |  |  |  |  |  |  |  |  |
|           |  |  |  |  |  |  |  |  |  |
|           |  |  |  |  |  |  |  |  |  |
|           |  |  |  |  |  |  |  |  |  |
|           |  |  |  |  |  |  |  |  |  |
|           |  |  |  |  |  |  |  |  |  |
|           |  |  |  |  |  |  |  |  |  |
|           |  |  |  |  |  |  |  |  |  |
|           |  |  |  |  |  |  |  |  |  |
|           |  |  |  |  |  |  |  |  |  |
|           |  |  |  |  |  |  |  |  |  |
|           |  |  |  |  |  |  |  |  |  |
|           |  |  |  |  |  |  |  |  |  |
|           |  |  |  |  |  |  |  |  |  |
|           |  |  |  |  |  |  |  |  |  |
|           |  |  |  |  |  |  |  |  |  |

|          |                   |        |        |       |       |   |       |
|----------|-------------------|--------|--------|-------|-------|---|-------|
| NAO_FMA  | 0.495             | 0.4972 | -0.479 | 1.470 | 0.992 | 1 | 0.319 |
| NAO_MAM  | -0.140            | 0.3335 | -0.793 | 0.514 | 0.176 | 1 | 0.675 |
| MJO_JFM  | -0.311            | 0.5452 | -1.379 | 0.758 | 0.325 | 1 | 0.568 |
| MJO_FMA  | 0.652             | 0.8262 | -0.967 | 2.271 | 0.623 | 1 | 0.430 |
| MJO_MAM  | -0.704            | 0.5416 | -1.765 | 0.358 | 1.688 | 1 | 0.194 |
| ONI_JFM  | 1.148             | 0.8666 | -0.551 | 2.846 | 1.755 | 1 | 0.185 |
| ONI_FMA  | -0.824            | 1.5639 | -3.889 | 2.242 | 0.277 | 1 | 0.598 |
| ONI_MAM  | 0.134             | 0.9360 | -1.701 | 1.969 | 0.020 | 1 | 0.886 |
| PDO_JFM  | 0.094             | 0.7832 | -1.441 | 1.630 | 0.015 | 1 | 0.904 |
| PDO_FMA  | 0.183             | 1.1999 | -2.169 | 2.535 | 0.023 | 1 | 0.879 |
| PDO_MAM  | -0.231            | 0.4815 | -1.174 | 0.713 | 0.229 | 1 | 0.632 |
| PNA_JFM  | 0.325             | 0.2053 | -0.077 | 0.728 | 2.510 | 1 | 0.113 |
| PNA_FMA  | 0.112             | 0.2822 | -0.441 | 0.665 | 0.157 | 1 | 0.692 |
| PNA_MAM  | -0.531            | 0.2978 | -1.115 | 0.052 | 3.183 | 1 | 0.074 |
| ASOI_JFM | 0.244             | 0.3489 | -0.440 | 0.928 | 0.488 | 1 | 0.485 |
| ASOI_FMA | -0.250            | 0.4208 | -1.075 | 0.574 | 0.354 | 1 | 0.552 |
| ASOI_MAM | 0.529             | 0.2734 | -0.007 | 1.064 | 3.738 | 1 | 0.053 |
| (Scale)  | .497 <sup>a</sup> | 0.1075 | 0.326  | 0.760 |       |   |       |

Probability Distribution: Tweedie (1.77)

Omnibus Value: 0.376

a. Maximum likelihood estimate      Link Function: Log

EUS June

| Parameter   | B          | Std. Error | 95% Wald Confidence Interval |        | Wald Chi-Square | Hypothesis Test |              |
|-------------|------------|------------|------------------------------|--------|-----------------|-----------------|--------------|
|             |            |            | Lower                        | Upper  |                 | df              | Sig.         |
| (Intercept) | 3.930      | 0.1821     | 3.573                        | 4.287  | 465.819         | 1               | 0.000        |
| AO_JFM      | -4.304E-05 | 0.2885     | -0.566                       | 0.565  | 0.000           | 1               | 1.000        |
| AO_FMA      | 0.422      | 0.4885     | -0.536                       | 1.379  | 0.745           | 1               | 0.388        |
| AO_MAM      | 0.122      | 0.3493     | -0.562                       | 0.807  | 0.122           | 1               | 0.727        |
| NAO_JFM     | -0.044     | 0.3237     | -0.679                       | 0.590  | 0.019           | 1               | 0.891        |
| NAO_FMA     | -0.167     | 0.4782     | -1.104                       | 0.770  | 0.122           | 1               | 0.727        |
| NAO_MAM     | -0.187     | 0.3210     | -0.816                       | 0.443  | 0.338           | 1               | 0.561        |
| MJO_JFM     | -1.353     | 0.5431     | -2.417                       | -0.288 | 6.205           | 1               | <b>0.013</b> |
| MJO_FMA     | 1.228      | 0.8451     | -0.429                       | 2.884  | 2.110           | 1               | 0.146        |
| MJO_MAM     | -0.219     | 0.5191     | -1.237                       | 0.798  | 0.179           | 1               | 0.672        |
| ONI_JFM     | 0.642      | 0.8889     | -1.101                       | 2.384  | 0.521           | 1               | 0.470        |
| ONI_FMA     | -1.066     | 1.6214     | -4.244                       | 2.112  | 0.432           | 1               | 0.511        |
| ONI_MAM     | 1.041      | 1.0049     | -0.928                       | 3.011  | 1.074           | 1               | 0.300        |
| PDO_JFM     | 0.695      | 0.7989     | -0.871                       | 2.260  | 0.756           | 1               | 0.385        |
| PDO_FMA     | -1.065     | 1.2451     | -3.505                       | 1.376  | 0.731           | 1               | 0.393        |
| PDO_MAM     | 0.300      | 0.5033     | -0.686                       | 1.286  | 0.355           | 1               | 0.551        |

|                                          |                   |                    |        |       |                      |   |       |
|------------------------------------------|-------------------|--------------------|--------|-------|----------------------|---|-------|
| PNA_JFM                                  | 0.124             | 0.2014             | -0.271 | 0.518 | 0.377                | 1 | 0.539 |
| PNA_FMA                                  | 0.250             | 0.2947             | -0.327 | 0.828 | 0.722                | 1 | 0.395 |
| PNA_MAM                                  | 0.332             | 0.3037             | -0.263 | 0.928 | 1.197                | 1 | 0.274 |
| ASOI_JFM                                 | 0.506             | 0.3575             | -0.194 | 1.207 | 2.007                | 1 | 0.157 |
| ASOI_FMA                                 | -0.651            | 0.4185             | -1.471 | 0.169 | 2.420                | 1 | 0.120 |
| ASOI_MAM                                 | 0.497             | 0.2767             | -0.046 | 1.039 | 3.224                | 1 | 0.073 |
| (Scale)                                  | .498 <sup>a</sup> | 0.1075             | 0.326  | 0.760 |                      |   |       |
| Probability Distribution: Tweedie (1.75) |                   |                    |        |       | Omnibus Value: 0.121 |   |       |
| a. Maximum likelihood estimate           |                   | Link Function: Log |        |       |                      |   |       |

#### GPUS April

|                                          |                   |                    | 95% Wald Confidence Interval |        | Hypothesis Test      |    |              |
|------------------------------------------|-------------------|--------------------|------------------------------|--------|----------------------|----|--------------|
| Parameter                                | B                 | Std. Error         | Lower                        | Upper  | Wald Chi-Square      | df | Sig.         |
| (Intercept)                              | 3.093             | 0.1421             | 2.815                        | 3.372  | 473.599              | 1  | 0.000        |
| AO_JFM                                   | -0.057            | 0.3472             | -0.737                       | 0.624  | 0.027                | 1  | 0.870        |
| AO_FMA                                   | -0.658            | 0.5496             | -1.736                       | 0.419  | 1.435                | 1  | 0.231        |
| AO_MAM                                   | 0.581             | 0.4525             | -0.305                       | 1.468  | 1.651                | 1  | 0.199        |
| NAO_JFM                                  | 0.383             | 0.4511             | -0.501                       | 1.267  | 0.720                | 1  | 0.396        |
| NAO_FMA                                  | 0.408             | 0.5550             | -0.680                       | 1.496  | 0.540                | 1  | 0.462        |
| NAO_MAM                                  | -0.404            | 0.4310             | -1.249                       | 0.440  | 0.880                | 1  | 0.348        |
| MJO_JFM                                  | -0.039            | 0.5508             | -1.119                       | 1.040  | 0.005                | 1  | 0.943        |
| MJO_FMA                                  | 0.492             | 0.6129             | -0.709                       | 1.693  | 0.644                | 1  | 0.422        |
| MJO_MAM                                  | -0.004            | 0.5880             | -1.157                       | 1.148  | 0.000                | 1  | 0.994        |
| ONI_JFM                                  | -0.017            | 1.1573             | -2.285                       | 2.252  | 0.000                | 1  | 0.988        |
| ONI_FMA                                  | 0.020             | 2.5389             | -4.956                       | 4.996  | 0.000                | 1  | 0.994        |
| ONI_MAM                                  | 0.088             | 1.5277             | -2.906                       | 3.083  | 0.003                | 1  | 0.954        |
| PDO_JFM                                  | 1.225             | 0.9065             | -0.552                       | 3.002  | 1.826                | 1  | 0.177        |
| PDO_FMA                                  | -2.186            | 1.4502             | -5.028                       | 0.657  | 2.271                | 1  | 0.132        |
| PDO_MAM                                  | 0.940             | 0.6777             | -0.389                       | 2.268  | 1.922                | 1  | 0.166        |
| PNA_JFM                                  | 0.036             | 0.3177             | -0.587                       | 0.659  | 0.013                | 1  | 0.910        |
| PNA_FMA                                  | 0.051             | 0.4316             | -0.795                       | 0.897  | 0.014                | 1  | 0.906        |
| PNA_MAM                                  | -0.710            | 0.5005             | -1.691                       | 0.271  | 2.012                | 1  | 0.156        |
| ASOI_JFM                                 | -0.245            | 0.2308             | -0.698                       | 0.207  | 1.129                | 1  | 0.288        |
| ASOI_FMA                                 | 0.553             | 0.3375             | -0.109                       | 1.214  | 2.683                | 1  | 0.101        |
| ASOI_MAM                                 | -0.454            | 0.2258             | -0.897                       | -0.012 | 4.044                | 1  | <b>0.044</b> |
| (Scale)                                  | .773 <sup>a</sup> | 0.1518             | 0.526                        | 1.136  |                      |    |              |
| Probability Distribution: Tweedie (1.77) |                   |                    |                              |        | Omnibus Value: 0.403 |    |              |
| a. Maximum likelihood estimate           |                   | Link Function: Log |                              |        |                      |    |              |

#### GPUS May

| Parameter   | B      | Std. Error | 95% Wald Confidence Interval |        | Hypothesis Test |    |              |
|-------------|--------|------------|------------------------------|--------|-----------------|----|--------------|
|             |        |            | Lower                        | Upper  | Wald Chi-Square | df | Sig.         |
| (Intercept) | 3.929  | 0.0936     | 3.745                        | 4.112  | 1761.581        | 1  | 0.000        |
| AO_JFM      | 0.353  | 0.2252     | -0.089                       | 0.794  | 2.451           | 1  | 0.117        |
| AO_FMA      | 0.205  | 0.3211     | -0.424                       | 0.834  | 0.407           | 1  | 0.524        |
| AO_MAM      | -0.224 | 0.2910     | -0.794                       | 0.346  | 0.593           | 1  | 0.441        |
| NAO_JFM     | -0.942 | 0.2802     | -1.491                       | -0.393 | 11.302          | 1  | <b>0.001</b> |
| NAO_FMA     | 0.604  | 0.3411     | -0.065                       | 1.273  | 3.135           | 1  | 0.077        |
| NAO_MAM     | -0.321 | 0.2783     | -0.867                       | 0.224  | 1.333           | 1  | 0.248        |
| MJO_JFM     | 0.153  | 0.3532     | -0.539                       | 0.845  | 0.188           | 1  | 0.665        |
| MJO_FMA     | 0.034  | 0.4184     | -0.786                       | 0.854  | 0.007           | 1  | 0.935        |
| MJO_MAM     | -0.619 | 0.3355     | -1.276                       | 0.039  | 3.403           | 1  | 0.065        |
| ONI_JFM     | 0.609  | 0.7709     | -0.902                       | 2.120  | 0.624           | 1  | 0.430        |
| ONI_FMA     | -1.487 | 1.6618     | -4.744                       | 1.770  | 0.801           | 1  | 0.371        |
| ONI_MAM     | 0.680  | 0.9786     | -1.238                       | 2.598  | 0.483           | 1  | 0.487        |
| PDO_JFM     | -0.946 | 0.5572     | -2.038                       | 0.146  | 2.880           | 1  | 0.090        |

|          |                   |        |        |        |       |   |              |
|----------|-------------------|--------|--------|--------|-------|---|--------------|
| PDO_FMA  | 1.200             | 0.9118 | -0.587 | 2.987  | 1.731 | 1 | 0.188        |
| PDO_MAM  | -0.301            | 0.4556 | -1.194 | 0.591  | 0.438 | 1 | 0.508        |
| PNA_JFM  | 0.462             | 0.2029 | 0.064  | 0.859  | 5.178 | 1 | <b>0.023</b> |
| PNA_FMA  | -0.570            | 0.2763 | -1.111 | -0.028 | 4.254 | 1 | <b>0.039</b> |
| PNA_MAM  | 0.230             | 0.3299 | -0.416 | 0.877  | 0.487 | 1 | 0.485        |
| ASOI_JFM | -0.179            | 0.1511 | -0.475 | 0.117  | 1.402 | 1 | 0.236        |
| ASOI_FMA | 0.066             | 0.2140 | -0.354 | 0.485  | 0.094 | 1 | 0.759        |
| ASOI_MAM | 0.049             | 0.1428 | -0.231 | 0.329  | 0.117 | 1 | 0.733        |
| (Scale)  | .559 <sup>a</sup> | 0.1128 | 0.377  | 0.831  |       |   |              |

Probability Distribution: Tweedie (1.68)

Omnibus Value: 0.077

a. Maximum likelihood estimate Link Function: Log

| 95% Wald Confidence Interval |                   |            |        |        | Hypothesis Test |    |              |
|------------------------------|-------------------|------------|--------|--------|-----------------|----|--------------|
| Parameter                    | B                 | Std. Error | Lower  | Upper  | Wald Chi-Square | df | Sig.         |
| (Intercept)                  | 3.525             | 0.0691     | 3.390  | 3.661  | 2601.965        | 1  | <b>0.000</b> |
| AO_JFM                       | 0.858             | 0.1584     | 0.547  | 1.168  | 29.299          | 1  | <b>0.000</b> |
| AO_FMA                       | -0.871            | 0.2515     | -1.364 | -0.378 | 11.992          | 1  | <b>0.001</b> |
| AO_MAM                       | 0.412             | 0.2221     | -0.023 | 0.847  | 3.440           | 1  | 0.064        |
| NAO_JFM                      | -0.937            | 0.2065     | -1.341 | -0.532 | 20.581          | 1  | <b>0.000</b> |
| NAO_FMA                      | 0.828             | 0.2535     | 0.331  | 1.325  | 10.677          | 1  | <b>0.001</b> |
| NAO_MAM                      | -0.209            | 0.2001     | -0.601 | 0.183  | 1.092           | 1  | 0.296        |
| MJO_JFM                      | 0.390             | 0.2480     | -0.096 | 0.876  | 2.469           | 1  | 0.116        |
| MJO_FMA                      | 0.311             | 0.2902     | -0.257 | 0.880  | 1.151           | 1  | 0.283        |
| MJO_MAM                      | -0.435            | 0.2497     | -0.925 | 0.054  | 3.040           | 1  | 0.081        |
| ONI_JFM                      | 0.542             | 0.5393     | -0.515 | 1.599  | 1.010           | 1  | 0.315        |
| ONI_FMA                      | -2.295            | 1.1473     | -4.544 | -0.046 | 4.001           | 1  | <b>0.045</b> |
| ONI_MAM                      | 2.012             | 0.6687     | 0.701  | 3.322  | 9.053           | 1  | <b>0.003</b> |
| PDO_JFM                      | 0.747             | 0.4121     | -0.060 | 1.555  | 3.290           | 1  | 0.070        |
| PDO_FMA                      | -1.808            | 0.6732     | -3.128 | -0.489 | 7.213           | 1  | <b>0.007</b> |
| PDO_MAM                      | 0.946             | 0.3355     | 0.288  | 1.603  | 7.945           | 1  | <b>0.005</b> |
| PNA_JFM                      | 0.213             | 0.1524     | -0.086 | 0.512  | 1.952           | 1  | 0.162        |
| PNA_FMA                      | 0.317             | 0.2142     | -0.103 | 0.736  | 2.185           | 1  | 0.139        |
| PNA_MAM                      | -0.628            | 0.2435     | -1.105 | -0.150 | 6.640           | 1  | <b>0.010</b> |
| ASOI_JFM                     | 0.030             | 0.1125     | -0.190 | 0.251  | 0.072           | 1  | 0.788        |
| ASOI_FMA                     | 0.182             | 0.1633     | -0.139 | 0.502  | 1.236           | 1  | 0.266        |
| ASOI_MAM                     | 0.012             | 0.1066     | -0.197 | 0.221  | 0.012           | 1  | 0.913        |
| (Scale)                      | .515 <sup>a</sup> | 0.1053     | 0.344  | 0.768  |                 |    |              |

Probability Distribution: Tweedie (1.5)

Omnibus Value: **0.001**

a. Maximum likelihood estimate Link Function: Log

## MWUS April

| 95% Wald Confidence Interval |        |            |         |        | Hypothesis Test |    |              |
|------------------------------|--------|------------|---------|--------|-----------------|----|--------------|
| Parameter                    | B      | Std. Error | Lower   | Upper  | Wald Chi-Square | df | Sig.         |
| (Intercept)                  | 1.572  | 0.2816     | 1.020   | 2.124  | 31.169          | 1  | 0.000        |
| AO_JFM                       | -0.290 | 0.3893     | -1.053  | 0.474  | 0.553           | 1  | 0.457        |
| AO_FMA                       | -1.460 | 0.6094     | -2.655  | -0.266 | 5.742           | 1  | <b>0.017</b> |
| AO_MAM                       | 1.080  | 0.5936     | -0.083  | 2.244  | 3.311           | 1  | 0.069        |
| NAO_JFM                      | 0.519  | 0.4716     | -0.405  | 1.444  | 1.213           | 1  | 0.271        |
| NAO_FMA                      | 2.610  | 0.7186     | 1.202   | 4.019  | 13.192          | 1  | <b>0.000</b> |
| NAO_MAM                      | -1.399 | 0.6834     | -2.738  | -0.059 | 4.189           | 1  | <b>0.041</b> |
| MJO_JFM                      | -1.716 | 0.8578     | -3.398  | -0.035 | 4.004           | 1  | <b>0.045</b> |
| MJO_FMA                      | 0.889  | 1.0497     | -1.169  | 2.946  | 0.717           | 1  | 0.397        |
| MJO_MAM                      | 0.527  | 0.7933     | -1.028  | 2.082  | 0.441           | 1  | 0.506        |
| ONI_JFM                      | 1.865  | 1.3394     | -0.761  | 4.490  | 1.938           | 1  | 0.164        |
| ONI_FMA                      | 2.054  | 2.8799     | -3.590  | 7.699  | 0.509           | 1  | 0.476        |
| ONI_MAM                      | -6.727 | 3.2853     | -13.166 | -0.288 | 4.192           | 1  | <b>0.041</b> |
| PDO_JFM                      | 0.508  | 1.0854     | -1.619  | 2.635  | 0.219           | 1  | 0.640        |
| PDO_FMA                      | 3.922  | 1.9173     | 0.164   | 7.679  | 4.183           | 1  | <b>0.041</b> |

|                                          |                   |        |        |        |        |   |                             |
|------------------------------------------|-------------------|--------|--------|--------|--------|---|-----------------------------|
| PDO_MAM                                  | -5.547            | 1.4990 | -8.484 | -2.609 | 13.692 | 1 | <b>0.000</b>                |
| PNA_JFM                                  | -1.197            | 0.3942 | -1.970 | -0.425 | 9.223  | 1 | <b>0.002</b>                |
| PNA_FMA                                  | 0.382             | 0.5893 | -0.773 | 1.537  | 0.420  | 1 | 0.517                       |
| PNA_MAM                                  | 2.709             | 0.5642 | 1.604  | 3.815  | 23.061 | 1 | <b>0.000</b>                |
| ASOI_JFM                                 | 0.120             | 0.5662 | -0.990 | 1.229  | 0.045  | 1 | 0.833                       |
| ASOI_FMA                                 | 1.491             | 0.7164 | 0.087  | 2.896  | 4.334  | 1 | <b>0.037</b>                |
| ASOI_MAM                                 | -1.204            | 0.5402 | -2.263 | -0.145 | 4.967  | 1 | <b>0.026</b>                |
| (Scale)                                  | .446 <sup>a</sup> | 0.0975 | 0.291  | 0.685  |        |   |                             |
| Probability Distribution: Tweedie (1.76) |                   |        |        |        |        |   | Omnibus Value: <b>0.000</b> |
| a. Maximum likelihood estimate.          |                   |        |        |        |        |   | Link Function: Log          |

| MWUS                                     |                   |            |         |        |                 |    |                             |  |
|------------------------------------------|-------------------|------------|---------|--------|-----------------|----|-----------------------------|--|
| May                                      |                   |            |         |        |                 |    |                             |  |
| 95% Wald Confidence Interval             |                   |            |         |        | Hypothesis Test |    |                             |  |
| Parameter                                | B                 | Std. Error | Lower   | Upper  | Wald Chi-Square | df | Sig.                        |  |
| (Intercept)                              | 3.044             | 0.2891     | 2.477   | 3.611  | 110.869         | 1  | 0.000                       |  |
| AO_JFM                                   | 0.570             | 0.3969     | -0.208  | 1.348  | 2.060           | 1  | 0.151                       |  |
| AO_FMA                                   | 1.010             | 0.7325     | -0.426  | 2.446  | 1.901           | 1  | 0.168                       |  |
| AO_MAM                                   | -1.202            | 0.6675     | -2.510  | 0.107  | 3.241           | 1  | 0.072                       |  |
| NAO_JFM                                  | -0.785            | 0.4603     | -1.687  | 0.117  | 2.911           | 1  | 0.088                       |  |
| NAO_FMA                                  | -0.750            | 0.7854     | -2.289  | 0.790  | 0.911           | 1  | 0.340                       |  |
| NAO_MAM                                  | 1.780             | 0.7383     | 0.333   | 3.227  | 5.812           | 1  | <b>0.016</b>                |  |
| MJO_JFM                                  | 0.376             | 0.8163     | -1.224  | 1.976  | 0.212           | 1  | 0.645                       |  |
| MJO_FMA                                  | 1.750             | 1.1174     | -0.440  | 3.940  | 2.452           | 1  | 0.117                       |  |
| MJO_MAM                                  | -1.901            | 0.7752     | -3.420  | -0.381 | 6.012           | 1  | <b>0.014</b>                |  |
| ONI_JFM                                  | 3.397             | 1.3601     | 0.731   | 6.063  | 6.237           | 1  | <b>0.013</b>                |  |
| ONI_FMA                                  | -8.289            | 3.0814     | -14.328 | -2.249 | 7.235           | 1  | <b>0.007</b>                |  |
| ONI_MAM                                  | 9.552             | 3.4871     | 2.717   | 16.386 | 7.503           | 1  | <b>0.006</b>                |  |
| PDO_JFM                                  | -0.655            | 1.0140     | -2.642  | 1.332  | 0.417           | 1  | 0.518                       |  |
| PDO_FMA                                  | 1.183             | 1.7558     | -2.258  | 4.624  | 0.454           | 1  | 0.500                       |  |
| PDO_MAM                                  | 0.683             | 1.4519     | -2.162  | 3.529  | 0.222           | 1  | 0.638                       |  |
| PNA_JFM                                  | 0.456             | 0.3951     | -0.318  | 1.230  | 1.332           | 1  | 0.248                       |  |
| PNA_FMA                                  | 0.232             | 0.5079     | -0.763  | 1.227  | 0.209           | 1  | 0.648                       |  |
| PNA_MAM                                  | -1.818            | 0.5867     | -2.968  | -0.668 | 9.603           | 1  | <b>0.002</b>                |  |
| ASOI_JFM                                 | 0.854             | 0.5819     | -0.287  | 1.994  | 2.151           | 1  | 0.142                       |  |
| ASOI_FMA                                 | -1.372            | 0.7240     | -2.791  | 0.047  | 3.590           | 1  | 0.058                       |  |
| ASOI_MAM                                 | 1.077             | 0.5222     | 0.053   | 2.100  | 4.251           | 1  | <b>0.039</b>                |  |
| (Scale)                                  | .270 <sup>a</sup> | 0.0589     | 0.177   | 0.414  |                 |    |                             |  |
| Probability Distribution: Tweedie (1.85) |                   |            |         |        |                 |    | Omnibus Value: <b>0.008</b> |  |
| a. Maximum likelihood estimate.          |                   |            |         |        |                 |    | Link Function: Log          |  |

| MWUS                         |        |            |        |        |                 |    |              |  |
|------------------------------|--------|------------|--------|--------|-----------------|----|--------------|--|
| June                         |        |            |        |        |                 |    |              |  |
| 95% Wald Confidence Interval |        |            |        |        | Hypothesis Test |    |              |  |
| Parameter                    | B      | Std. Error | Lower  | Upper  | Wald Chi-Square | df | Sig.         |  |
| (Intercept)                  | 2.646  | 0.2165     | 2.221  | 3.070  | 149.301         | 1  | 0.000        |  |
| AO_JFM                       | 0.088  | 0.3315     | -0.562 | 0.737  | 0.070           | 1  | 0.792        |  |
| AO_FMA                       | -0.128 | 0.5339     | -1.175 | 0.918  | 0.058           | 1  | 0.810        |  |
| AO_MAM                       | 0.436  | 0.5098     | -0.563 | 1.435  | 0.731           | 1  | 0.392        |  |
| NAO_JFM                      | -0.765 | 0.3784     | -1.507 | -0.023 | 4.089           | 1  | <b>0.043</b> |  |
| NAO_FMA                      | 1.319  | 0.5820     | 0.178  | 2.459  | 5.134           | 1  | <b>0.023</b> |  |
| NAO_MAM                      | -0.952 | 0.5790     | -2.087 | 0.183  | 2.702           | 1  | 0.100        |  |
| MJO_JFM                      | 0.690  | 0.7578     | -0.795 | 2.176  | 0.830           | 1  | 0.362        |  |
| MJO_FMA                      | -0.361 | 1.0410     | -2.401 | 1.679  | 0.120           | 1  | 0.729        |  |
| MJO_MAM                      | 0.849  | 0.6828     | -0.489 | 2.187  | 1.547           | 1  | 0.214        |  |
| ONI_JFM                      | -1.028 | 0.9984     | -2.984 | 0.929  | 1.059           | 1  | 0.303        |  |
| ONI_FMA                      | -1.259 | 2.2213     | -5.613 | 3.094  | 0.321           | 1  | 0.571        |  |
| ONI_MAM                      | 1.600  | 2.7753     | -3.839 | 7.040  | 0.332           | 1  | 0.564        |  |
| PDO_JFM                      | 2.730  | 0.8507     | 1.063  | 4.398  | 10.299          | 1  | <b>0.001</b> |  |
| PDO_FMA                      | -4.771 | 1.4567     | -7.626 | -1.916 | 10.726          | 1  | <b>0.001</b> |  |
| PDO_MAM                      | 3.317  | 1.2079     | 0.950  | 5.685  | 7.541           | 1  | <b>0.006</b> |  |

|          |                   |        |        |       |       |   |       |
|----------|-------------------|--------|--------|-------|-------|---|-------|
| PNA_JFM  | 0.655             | 0.3349 | -0.002 | 1.311 | 3.822 | 1 | 0.051 |
| PNA_FMA  | 0.090             | 0.4439 | -0.780 | 0.960 | 0.041 | 1 | 0.840 |
| PNA_MAM  | 0.609             | 0.5118 | -0.394 | 1.612 | 1.415 | 1 | 0.234 |
| ASOI_JFM | -0.548            | 0.5057 | -1.539 | 0.443 | 1.175 | 1 | 0.278 |
| ASOI_FMA | 0.605             | 0.5712 | -0.515 | 1.724 | 1.120 | 1 | 0.290 |
| ASOI_MAM | -0.261            | 0.3828 | -1.011 | 0.490 | 0.464 | 1 | 0.496 |
| (Scale)  | .276 <sup>a</sup> | 0.0607 | 0.180  | 0.425 |       |   |       |

Probability Distribution: Tweedie (1.82)

Omnibus Value: **0.047**

a. Maximum likelihood estimate.

Link Function: Log

## SUES March

|             | 95% Wald Confidence Interval |            |        |       | Hypothesis Test |    |              |
|-------------|------------------------------|------------|--------|-------|-----------------|----|--------------|
| Parameter   | B                            | Std. Error | Lower  | Upper | Wald Chi-Square | df | Sig.         |
| (Intercept) | 2.842                        | 0.1869     | 2.476  | 3.208 | 231.346         | 1  | 0.000        |
| AO-DJF      | 0.761                        | 0.4812     | -0.182 | 1.704 | 2.501           | 1  | 0.114        |
| AO-JFM      | -1.006                       | 0.8103     | -2.594 | 0.582 | 1.542           | 1  | 0.214        |
| AO-FMA      | 0.817                        | 0.5705     | -0.301 | 1.935 | 2.052           | 1  | 0.152        |
| NAO-DJF     | 0.338                        | 0.5152     | -0.671 | 1.348 | 0.431           | 1  | 0.511        |
| NAO-JFM     | 0.260                        | 0.8214     | -1.350 | 1.870 | 0.100           | 1  | 0.752        |
| NAO-FMA     | -0.837                       | 0.5056     | -1.828 | 0.154 | 2.742           | 1  | 0.098        |
| MJO-DJF     | 0.084                        | 0.6671     | -1.223 | 1.392 | 0.016           | 1  | 0.899        |
| MJO-JFM     | -0.614                       | 0.8460     | -2.272 | 1.045 | 0.526           | 1  | 0.468        |
| MJO-FMA     | 0.752                        | 0.8027     | -0.821 | 2.325 | 0.878           | 1  | 0.349        |
| ONI-DJF     | -0.296                       | 1.6902     | -3.609 | 3.017 | 0.031           | 1  | 0.861        |
| ONI-JFM     | -0.687                       | 2.9733     | -6.514 | 5.141 | 0.053           | 1  | 0.817        |
| ONI-FMA     | 1.037                        | 1.5815     | -2.063 | 4.137 | 0.430           | 1  | 0.512        |
| PDO-DJF     | -1.546                       | 0.9181     | -3.346 | 0.253 | 2.836           | 1  | 0.092        |
| PDO-JFM     | 3.508                        | 1.5725     | 0.426  | 6.590 | 4.977           | 1  | <b>0.026</b> |
| PDO-FMA     | -1.824                       | 0.9362     | -3.659 | 0.011 | 3.796           | 1  | 0.051        |
| PNA-DJF     | 0.467                        | 0.3235     | -0.167 | 1.101 | 2.083           | 1  | 0.149        |
| PNA-JFM     | -0.966                       | 0.5396     | -2.024 | 0.092 | 3.206           | 1  | 0.073        |
| PNA-FMA     | 0.608                        | 0.4102     | -0.196 | 1.412 | 2.198           | 1  | 0.138        |
| ASOI-DJF    | 0.010                        | 0.3018     | -0.581 | 0.602 | 0.001           | 1  | 0.972        |
| ASOI-JFM    | 0.435                        | 0.4254     | -0.398 | 1.269 | 1.047           | 1  | 0.306        |
| ASOI-FMA    | -0.578                       | 0.3000     | -1.166 | 0.010 | 3.709           | 1  | 0.054        |
| (Scale)     | 1.108 <sup>a</sup>           | 0.2148     | 0.757  | 1.620 |                 |    |              |

Probability Distribution: Tweedie (1.78)

Omnibus Value: 0.318

a. Maximum likelihood estimate.

Link Function: Log

## SEUS April

| Parameter   | B      | Std. Error | 95% Wald Confidence Interval |        | Hypothesis Test |    |              |
|-------------|--------|------------|------------------------------|--------|-----------------|----|--------------|
|             |        |            | Lower                        | Upper  | Wald Chi-Square | df | Sig.         |
| (Intercept) | 3.004  | 0.1282     | 2.752                        | 3.255  | 549.030         | 1  | 0.000        |
| AO-DJF      | 1.018  | 0.3660     | 0.301                        | 1.735  | 7.737           | 1  | <b>0.005</b> |
| AO-JFM      | -1.943 | 0.5978     | -3.114                       | -0.771 | 10.562          | 1  | <b>0.001</b> |
| AO-FMA      | 1.022  | 0.3972     | 0.243                        | 1.800  | 6.619           | 1  | <b>0.010</b> |
| NAO-DJF     | -1.006 | 0.3720     | -1.735                       | -0.277 | 7.315           | 1  | <b>0.007</b> |
| NAO-JFM     | 2.130  | 0.6127     | 0.929                        | 3.331  | 12.079          | 1  | <b>0.001</b> |
| NAO-FMA     | -1.056 | 0.3943     | -1.829                       | -0.283 | 7.176           | 1  | <b>0.007</b> |
| MJO-DJF     | -0.201 | 0.4406     | -1.064                       | 0.663  | 0.208           | 1  | 0.648        |
| MJO-JFM     | -0.163 | 0.5586     | -1.258                       | 0.932  | 0.085           | 1  | 0.771        |
| MJO-FMA     | -0.034 | 0.5505     | -1.113                       | 1.045  | 0.004           | 1  | 0.951        |
| ONI-DJF     | 1.787  | 1.1524     | -0.472                       | 4.046  | 2.404           | 1  | 0.121        |
| ONI-JFM     | -1.913 | 1.9731     | -5.780                       | 1.954  | 0.940           | 1  | 0.332        |
| ONI-FMA     | -0.004 | 1.0351     | -2.033                       | 2.025  | 0.000           | 1  | 0.997        |
| PDO-DJF     | 0.117  | 0.6270     | -1.112                       | 1.346  | 0.035           | 1  | 0.852        |
| PDO-JFM     | -0.289 | 1.1240     | -2.492                       | 1.914  | 0.066           | 1  | 0.797        |
| PDO-FMA     | 0.398  | 0.6585     | -0.893                       | 1.689  | 0.365           | 1  | 0.546        |
| PNA-DJF     | -0.087 | 0.2098     | -0.498                       | 0.324  | 0.172           | 1  | 0.678        |

|          |                   |        |        |       |       |   |       |
|----------|-------------------|--------|--------|-------|-------|---|-------|
| PNA-JFM  | -0.452            | 0.3241 | -1.088 | 0.183 | 1.948 | 1 | 0.163 |
| PNA-FMA  | 0.065             | 0.2611 | -0.447 | 0.577 | 0.061 | 1 | 0.804 |
| ASOI-DJF | 0.038             | 0.2007 | -0.355 | 0.431 | 0.036 | 1 | 0.850 |
| ASOI-JFM | -0.386            | 0.2956 | -0.965 | 0.193 | 1.705 | 1 | 0.192 |
| ASOI-FMA | 0.393             | 0.2045 | -0.008 | 0.794 | 3.686 | 1 | 0.055 |
| (Scale)  | .582 <sup>a</sup> | 0.1173 | 0.392  | 0.864 |       |   |       |

Probability Distribution: Tweedie (1.77)

Omnibus Value: 0.191

a. Maximum likelihood estimate.

Link Function: Log

#### SEUS May

| Parameter   | B                 | Std. Error | 95% Wald Confidence Interval |        | Wald Chi-Square | Hypothesis Test |              |
|-------------|-------------------|------------|------------------------------|--------|-----------------|-----------------|--------------|
|             |                   |            | Lower                        | Upper  |                 | df              | Sig.         |
| (Intercept) | 2.779             | 0.1632     | 2.459                        | 3.099  | 289.833         | 1               | 0.000        |
| AO-DJF      | 1.225             | 0.4978     | 0.249                        | 2.200  | 6.052           | 1               | <b>0.014</b> |
| AO-JFM      | -1.856            | 0.7966     | -3.418                       | -0.295 | 5.432           | 1               | <b>0.020</b> |
| AO-FMA      | 1.233             | 0.4959     | 0.261                        | 2.205  | 6.181           | 1               | <b>0.013</b> |
| NAO-DJF     | -1.220            | 0.5265     | -2.252                       | -0.188 | 5.367           | 1               | <b>0.021</b> |
| NAO-JFM     | 2.051             | 0.8339     | 0.417                        | 3.686  | 6.050           | 1               | <b>0.014</b> |
| NAO-FMA     | -0.937            | 0.4904     | -1.899                       | 0.024  | 3.653           | 1               | 0.056        |
| MJO-DJF     | 0.431             | 0.5595     | -0.665                       | 1.528  | 0.594           | 1               | 0.441        |
| MJO-JFM     | -1.251            | 0.6654     | -2.556                       | 0.053  | 3.536           | 1               | 0.060        |
| MJO-FMA     | 1.785             | 0.6471     | 0.517                        | 3.054  | 7.612           | 1               | <b>0.006</b> |
| ONI-DJF     | -0.459            | 1.3541     | -3.113                       | 2.195  | 0.115           | 1               | 0.735        |
| ONI-JFM     | 1.862             | 2.2873     | -2.621                       | 6.345  | 0.663           | 1               | 0.416        |
| ONI-FMA     | -1.720            | 1.1831     | -4.039                       | 0.599  | 2.114           | 1               | 0.146        |
| PDO-DJF     | -1.265            | 0.7465     | -2.728                       | 0.198  | 2.871           | 1               | 0.090        |
| PDO-JFM     | 1.502             | 1.3288     | -1.102                       | 4.107  | 1.278           | 1               | 0.258        |
| PDO-FMA     | -0.029            | 0.7437     | -1.487                       | 1.428  | 0.002           | 1               | 0.969        |
| PNA-DJF     | -0.168            | 0.2487     | -0.655                       | 0.320  | 0.454           | 1               | 0.500        |
| PNA-JFM     | -0.413            | 0.3975     | -1.192                       | 0.367  | 1.077           | 1               | 0.299        |
| PNA-FMA     | 0.479             | 0.3018     | -0.112                       | 1.071  | 2.522           | 1               | 0.112        |
| ASOI-DJF    | 0.353             | 0.2346     | -0.107                       | 0.813  | 2.264           | 1               | 0.132        |
| ASOI-JFM    | -0.328            | 0.3613     | -1.036                       | 0.380  | 0.825           | 1               | 0.364        |
| ASOI-FMA    | 0.231             | 0.2765     | -0.311                       | 0.773  | 0.698           | 1               | 0.403        |
| (Scale)     | .568 <sup>a</sup> | 0.1127     | 0.385                        | 0.838  |                 |                 |              |

Probability Distribution: Tweedie (1.87)

Omnibus Value: **0.002**

a. Maximum likelihood estimate.

Link Function: Log

**Table S2.** Parameter estimates for generalized linear models analyzing the relationship between regional > EF0 tornado frequency and their corresponding tri-monthly climate index averages. Bold indicates significant values ( $\alpha < 0.05$ ).

| EUS April                                |                   |                    |                              |        |                             |         |      |              |  |
|------------------------------------------|-------------------|--------------------|------------------------------|--------|-----------------------------|---------|------|--------------|--|
| Parameter                                | B                 | Std. Error         | 95% Wald Confidence Interval |        | Hypothesis Test             |         |      |              |  |
|                                          |                   |                    | Lower                        | Upper  | Wald Chi-Square             | df      | Sig. |              |  |
| (Intercept)                              | 4.149             | 0.1361             |                              | 3.882  | 4.416                       | 929.272 | 1    | 0.000        |  |
| AO_JFM                                   | -0.115            | 0.1725             |                              | -0.453 | 0.223                       | 0.445   | 1    | 0.505        |  |
| NAO_JFM                                  | 0.013             | 0.2660             |                              | -0.508 | 0.534                       | 0.002   | 1    | 0.962        |  |
| MJO_JFM                                  | -0.199            | 0.3297             |                              | -0.845 | 0.447                       | 0.364   | 1    | 0.546        |  |
| ONI_JFM                                  | 0.191             | 0.2382             |                              | -0.275 | 0.658                       | 0.646   | 1    | 0.421        |  |
| PDO_JFM                                  | -0.086            | 0.1245             |                              | -0.330 | 0.158                       | 0.481   | 1    | 0.488        |  |
| PNA_JFM                                  | -0.079            | 0.1401             |                              | -0.354 | 0.195                       | 0.319   | 1    | 0.572        |  |
| ASOI_JFM                                 | 0.234             | 0.1149             |                              | 0.009  | 0.459                       | 4.142   | 1    | <b>0.042</b> |  |
| (Scale)                                  | .755 <sup>a</sup> | 0.1603             |                              | 0.498  | 1.145                       |         |      |              |  |
| Probability Distribution: Tweedie (1.75) |                   |                    |                              |        | Omnibus Value: <b>0.004</b> |         |      |              |  |
| a. Maximum likelihood estimate.          |                   | Link Function: Log |                              |        |                             |         |      |              |  |

| EUS May     |                   |            |                              |        |                 |          |      |       |  |
|-------------|-------------------|------------|------------------------------|--------|-----------------|----------|------|-------|--|
| Parameter   | B                 | Std. Error | 95% Wald Confidence Interval |        | Hypothesis Test |          |      |       |  |
|             |                   |            | Lower                        | Upper  | Wald Chi-Square | df       | Sig. |       |  |
| (Intercept) | 4.504             | 0.1042     |                              | 4.299  | 4.708           | 1866.329 | 1    | 0.000 |  |
| AO_FMA      | 0.196             | 0.1965     |                              | -0.189 | 0.581           | 0.995    | 1    | 0.319 |  |
| NAO_FMA     | -0.158            | 0.2478     |                              | -0.644 | 0.328           | 0.406    | 1    | 0.524 |  |
| MJO_FMA     | -0.306            | 0.3851     |                              | -1.061 | 0.448           | 0.633    | 1    | 0.426 |  |
| ONI_FMA     | 0.418             | 0.2659     |                              | -0.104 | 0.939           | 2.465    | 1    | 0.116 |  |
| PDO_FMA     | 0.066             | 0.1304     |                              | -0.190 | 0.321           | 0.256    | 1    | 0.613 |  |
| PNA_FMA     | 0.076             | 0.1681     |                              | -0.253 | 0.406           | 0.207    | 1    | 0.649 |  |
| ASOI_FMA    | 0.238             | 0.1280     |                              | -0.013 | 0.489           | 3.459    | 1    | 0.063 |  |
| (Scale)     | .741 <sup>a</sup> | 0.1576     |                              | 0.489  | 1.125           |          |      |       |  |



Probability Distribution: Tweedie (1.77)

Omnibus Value: 0.566

a. Maximum likelihood  
estimate.

Link Function: Log

#### EUS June

| <i>Parameter</i> | <i>B</i>          | <i>Std. Error</i> | <i>95% Wald Confidence Interval</i> |              | <i>Hypothesis Test</i> |           |              |              |
|------------------|-------------------|-------------------|-------------------------------------|--------------|------------------------|-----------|--------------|--------------|
|                  |                   |                   | <i>Lower</i>                        | <i>Upper</i> | <i>Wald Chi-Square</i> | <i>df</i> | <i>Sig.</i>  |              |
| (Intercept)      | 4.033             | 0.1037            |                                     | 3.829        | 4.236                  | 1511.630  | 1            | 0.000        |
| AO_MAM           | 0.335             | 0.1678            |                                     | 0.006        | 0.664                  | 3.982     | 1            | <b>0.046</b> |
| NAO_MAM          | -0.253            | 0.1559            | -0.559                              | 0.052        | 2.643                  | 1         | 0.104        |              |
| MJO_MAM          | 0.087             | 0.3839            | -0.665                              | 0.840        | 0.052                  | 1         | 0.820        |              |
| ONI_MAM          | 0.418             | 0.2993            | -0.168                              | 1.005        | 1.952                  | 1         | 0.162        |              |
| PDO_MAM          | -0.031            | 0.1384            | -0.302                              | 0.240        | 0.050                  | 1         | 0.822        |              |
| PNA_MAM          | 0.479             | 0.2194            | 0.049                               | 0.909        | 4.759                  | 1         | <b>0.029</b> |              |
| ASOI_MAM         | 0.204             | 0.1520            | -0.094                              | 0.502        | 1.796                  | 1         | 0.180        |              |
| (Scale)          | .875 <sup>a</sup> | 0.1857            | 0.577                               | 1.326        |                        |           |              |              |

Probability Distribution: Tweedie (1.70)

Omnibus Value: 0.077

a. Maximum likelihood  
estimate.

Link Function: Log

#### GPUS April

| <i>Parameter</i> | <i>B</i>           | <i>Std. Error</i> | <i>95% Wald Confidence Interval</i> |              | <i>Hypothesis Test</i> |           |             |  |
|------------------|--------------------|-------------------|-------------------------------------|--------------|------------------------|-----------|-------------|--|
|                  |                    |                   | <i>Lower</i>                        | <i>Upper</i> | <i>Wald Chi-Square</i> | <i>df</i> | <i>Sig.</i> |  |
| (Intercept)      | 3.250              | 0.1358            | 2.984                               | 3.516        | 572.751                | 1         | 0.000       |  |
| AO_JFM           | -0.003             | 0.2032            | -0.401                              | 0.395        | 0.000                  | 1         | 0.988       |  |
| NAO_JFM          | -0.064             | 0.2947            | -0.641                              | 0.514        | 0.047                  | 1         | 0.829       |  |
| MJO_JFM          | 0.134              | 0.3955            | -0.641                              | 0.909        | 0.115                  | 1         | 0.735       |  |
| ONI_JFM          | -0.068             | 0.1538            | -0.369                              | 0.233        | 0.195                  | 1         | 0.658       |  |
| PDO_JFM          | -0.011             | 0.1877            | -0.379                              | 0.357        | 0.004                  | 1         | 0.951       |  |
| PNA_JFM          | -0.171             | 0.1991            | -0.562                              | 0.219        | 0.741                  | 1         | 0.389       |  |
| ASOI_JFM         | -0.040             | 0.0676            | -0.173                              | 0.092        | 0.358                  | 1         | 0.550       |  |
| (Scale)          | 1.072 <sup>a</sup> | 0.2048            | 0.738                               | 1.559        |                        |           |             |  |

Probability Distribution: Tweedie (1.77)

Omnibus Value: 0.717

a. Maximum likelihood  
estimate.

Link Function: Log

#### GPUS May

| 95% Wald Confidence Interval             |                   |                    |        |        |                      |          |              |       |  | Hypothesis Test |  |  |
|------------------------------------------|-------------------|--------------------|--------|--------|----------------------|----------|--------------|-------|--|-----------------|--|--|
| Parameter                                | B                 | Std. Error         | Lower  | Upper  | Wald Chi-Square      | df       | Sig.         |       |  |                 |  |  |
| (Intercept)                              | 3.926             | 0.0841             |        | 3.761  | 4.091                | 2179.677 | 1            | 0.000 |  |                 |  |  |
| AO_FMA                                   | 0.034             | 0.1385             | -0.238 | 0.305  | 0.059                | 1        | 0.807        |       |  |                 |  |  |
| NAO_FMA                                  | 0.040             | 0.2020             | -0.356 | 0.436  | 0.040                | 1        | 0.842        |       |  |                 |  |  |
| MJO_FMA                                  | 0.055             | 0.2690             | -0.472 | 0.582  | 0.042                | 1        | 0.838        |       |  |                 |  |  |
| ONI_FMA                                  | 0.024             | 0.1330             | -0.236 | 0.285  | 0.033                | 1        | 0.856        |       |  |                 |  |  |
| PDO_FMA                                  | 0.142             | 0.1056             | -0.065 | 0.349  | 1.801                | 1        | 0.180        |       |  |                 |  |  |
| PNA_FMA                                  | -0.266            | 0.1340             | -0.529 | -0.004 | 3.948                | 1        | <b>0.047</b> |       |  |                 |  |  |
| ASOI_FMA                                 | -0.103            | 0.0577             | -0.216 | 0.011  | 3.157                | 1        | 0.076        |       |  |                 |  |  |
| (Scale)                                  | .833 <sup>a</sup> | 0.1654             | 0.565  | 1.230  |                      |          |              |       |  |                 |  |  |
| Probability Distribution: Tweedie (1.68) |                   |                    |        |        | Omnibus Value: 0.143 |          |              |       |  |                 |  |  |
| a. Maximum likelihood estimate.          |                   | Link Function: Log |        |        |                      |          |              |       |  |                 |  |  |

| GPUS June                                |                   |                    |                              |                      |                 |          |       |       |
|------------------------------------------|-------------------|--------------------|------------------------------|----------------------|-----------------|----------|-------|-------|
|                                          |                   |                    | 95% Wald Confidence Interval |                      | Hypothesis Test |          |       |       |
| Parameter                                | B                 | Std. Error         | Lower                        | Upper                | Wald Chi-Square | df       | Sig.  |       |
| (Intercept)                              | 3.485             | 0.0878             |                              | 3.313                | 3.657           | 1575.063 | 1     | 0.000 |
| AO_MAM                                   | -0.066            | 0.1503             | -0.361                       | 0.228                | 0.194           | 1        | 0.659 |       |
| NAO_MAM                                  | 0.145             | 0.1621             | -0.173                       | 0.462                | 0.795           | 1        | 0.372 |       |
| MJO_MAM                                  | 0.181             | 0.2911             | -0.390                       | 0.751                | 0.385           | 1        | 0.535 |       |
| ONI_MAM                                  | 0.144             | 0.1434             | -0.137                       | 0.425                | 1.003           | 1        | 0.317 |       |
| PDO_MAM                                  | -0.140            | 0.0996             | -0.335                       | 0.055                | 1.980           | 1        | 0.159 |       |
| PNA_MAM                                  | 0.038             | 0.1566             | -0.269                       | 0.345                | 0.058           | 1        | 0.810 |       |
| ASOI_MAM                                 | 0.047             | 0.0744             | -0.099                       | 0.193                | 0.396           | 1        | 0.529 |       |
| (Scale)                                  | .835 <sup>a</sup> | 0.1663             | 0.566                        | 1.234                |                 |          |       |       |
| Probability Distribution: Tweedie (1.63) |                   |                    |                              | Omnibus Value: 0.884 |                 |          |       |       |
| a. Maximum likelihood estimate.          |                   | Link Function: Log |                              |                      |                 |          |       |       |

| <b>MWUS April</b> |          |                   |                                     |              |                        |           |             |  |
|-------------------|----------|-------------------|-------------------------------------|--------------|------------------------|-----------|-------------|--|
| <i>Parameter</i>  | <i>B</i> | <i>Std. Error</i> | <i>95% Wald Confidence Interval</i> |              | <i>Hypothesis Test</i> |           |             |  |
|                   |          |                   | <i>Lower</i>                        | <i>Upper</i> | <i>Wald Chi-Square</i> | <i>df</i> | <i>Sig.</i> |  |

|                                          |                    |        |                             |       |         |   |              |
|------------------------------------------|--------------------|--------|-----------------------------|-------|---------|---|--------------|
| (Intercept)                              | 2.475              | 0.2372 | 2.010                       | 2.940 | 108.850 | 1 | 0.000        |
| AO_JFM                                   | -0.358             | 0.2950 | -0.936                      | 0.220 | 1.476   | 1 | 0.224        |
| NAO_JFM                                  | 0.398              | 0.4474 | -0.479                      | 1.275 | 0.791   | 1 | 0.374        |
| MJO_JFM                                  | -0.957             | 0.5893 | -2.112                      | 0.198 | 2.639   | 1 | 0.104        |
| ONI_JFM                                  | 0.498              | 0.4278 | -0.340                      | 1.337 | 1.356   | 1 | 0.244        |
| PDO_JFM                                  | 0.331              | 0.2205 | -0.101                      | 0.763 | 2.250   | 1 | 0.134        |
| PNA_JFM                                  | -0.262             | 0.2583 | -0.768                      | 0.245 | 1.026   | 1 | 0.311        |
| ASOI_JFM                                 | 0.500              | 0.2201 | 0.069                       | 0.931 | 5.160   | 1 | <b>0.023</b> |
| (Scale)                                  | 1.131 <sup>a</sup> | 0.2277 | 0.763                       | 1.679 |         |   |              |
| Probability Distribution: Tweedie (1.84) |                    |        | Omnibus Value: <b>0.026</b> |       |         |   |              |
| a. Maximum likelihood estimate.          | Link Function: Log |        |                             |       |         |   |              |

| MWUS May                                 |                    |            |                              |                      |                 |    |              |  |
|------------------------------------------|--------------------|------------|------------------------------|----------------------|-----------------|----|--------------|--|
|                                          |                    |            | 95% Wald Confidence Interval |                      | Hypothesis Test |    |              |  |
| Parameter                                | B                  | Std. Error | Lower                        | Upper                | Wald Chi-Square | df | Sig.         |  |
| (Intercept)                              | 3.011              | 0.1472     | 2.722                        | 3.299                | 418.110         | 1  | 0.000        |  |
| AO_FMA                                   | 0.079              | 0.2841     | -0.478                       | 0.636                | 0.078           | 1  | 0.780        |  |
| NAO_FMA                                  | 0.000              | 0.3572     | -0.700                       | 0.700                | 0.000           | 1  | 0.999        |  |
| MJO_FMA                                  | 0.086              | 0.5006     | -0.895                       | 1.067                | 0.030           | 1  | 0.864        |  |
| ONI_FMA                                  | 1.039              | 0.4082     | 0.239                        | 1.839                | 6.483           | 1  | <b>0.011</b> |  |
| PDO_FMA                                  | 0.208              | 0.1846     | -0.153                       | 0.570                | 1.274           | 1  | 0.259        |  |
| PNA_FMA                                  | 0.032              | 0.2496     | -0.457                       | 0.521                | 0.017           | 1  | 0.898        |  |
| ASOI_FMA                                 | 0.550              | 0.1878     | 0.181                        | 0.918                | 8.564           | 1  | <b>0.003</b> |  |
| (Scale)                                  | .937 <sup>a</sup>  | 0.1891     | 0.631                        | 1.391                |                 |    |              |  |
| Probability Distribution: Tweedie (1.83) |                    |            |                              | Omnibus Value: 0.162 |                 |    |              |  |
| a. Maximum likelihood estimate.          | Link Function: Log |            |                              |                      |                 |    |              |  |

| MWUS June        |          |                   |                                     |              |                        |           |  |  |              |  |
|------------------|----------|-------------------|-------------------------------------|--------------|------------------------|-----------|--|--|--------------|--|
| <i>Parameter</i> | <i>B</i> | <i>Std. Error</i> | <i>95% Wald Confidence Interval</i> |              | <i>Hypothesis Test</i> |           |  |  | <i>Sig.</i>  |  |
|                  |          |                   | <i>Lower</i>                        | <i>Upper</i> | <i>Wald Chi-Square</i> | <i>df</i> |  |  |              |  |
| (Intercept)      | 3.222    | 0.1335            | 2.961                               | 3.484        | 582.931                | 1         |  |  | 0.000        |  |
| AO_MAM           | 0.447    | 0.2042            | 0.047                               | 0.847        | 4.802                  | 1         |  |  | <b>0.028</b> |  |
| NAO_MAM          | -0.572   | 0.2054            | -0.975                              | -0.170       | 7.757                  | 1         |  |  | <b>0.005</b> |  |

|          |                   |        |        |       |       |   |              |
|----------|-------------------|--------|--------|-------|-------|---|--------------|
| MJO_MAM  | 0.372             | 0.5136 | -0.634 | 1.379 | 0.525 | 1 | 0.469        |
| ONI_MAM  | 0.177             | 0.3851 | -0.578 | 0.932 | 0.211 | 1 | 0.646        |
| PDO_MAM  | -0.008            | 0.1835 | -0.368 | 0.351 | 0.002 | 1 | 0.964        |
| PNA_MAM  | 0.702             | 0.2845 | 0.144  | 1.259 | 6.083 | 1 | <b>0.014</b> |
| ASOI_MAM | 0.122             | 0.2025 | -0.275 | 0.519 | 0.365 | 1 | 0.546        |
| (Scale)  | .883 <sup>a</sup> | 0.1836 | 0.587  | 1.327 |       |   |              |

Probability Distribution: Tweedie 1.78

Omnibus Value: **0.044**

a. Maximum likelihood estimate.  
Link Function: Log

#### SEUS March

| Parameter   | B                  | Std. Error | 95% Wald Confidence Interval |        | Hypothesis Test |    |              |  |
|-------------|--------------------|------------|------------------------------|--------|-----------------|----|--------------|--|
|             |                    |            | Lower                        | Upper  | Wald Chi-Square | df | Sig.         |  |
| (Intercept) | 2.777              | 0.1733     | 2.438                        | 3.117  | 256.736         | 1  | 0.000        |  |
| AO-DJF      | 0.122              | 0.2289     | -0.326                       | 0.571  | 0.286           | 1  | 0.593        |  |
| NAO-DJF     | 0.184              | 0.2985     | -0.401                       | 0.769  | 0.379           | 1  | 0.538        |  |
| MJO-DJF     | 0.275              | 0.4949     | -0.695                       | 1.245  | 0.308           | 1  | 0.579        |  |
| ONI-DJF     | -0.339             | 0.1604     | -0.654                       | -0.025 | 4.469           | 1  | <b>0.035</b> |  |
| PDO-DJF     | -0.184             | 0.2348     | -0.644                       | 0.276  | 0.613           | 1  | 0.434        |  |
| PNA-DJF     | 0.376              | 0.2166     | -0.049                       | 0.800  | 3.007           | 1  | 0.083        |  |
| ASOI-DJF    | -0.007             | 0.0895     | -0.182                       | 0.168  | 0.006           | 1  | 0.938        |  |
| (Scale)     | 1.422 <sup>a</sup> | 0.2670     | 0.985                        | 2.055  |                 |    |              |  |

Probability Distribution: Tweedie 1.80

Omnibus Value: 0.262

a. Maximum likelihood estimate.  
Link Function: Log

#### SEUS April

| Parameter   | B      | Std. Error | 95% Wald Confidence Interval |       | Hypothesis Test |    |       |  |
|-------------|--------|------------|------------------------------|-------|-----------------|----|-------|--|
|             |        |            | Lower                        | Upper | Wald Chi-Square | df | Sig.  |  |
| (Intercept) | 3.039  | 0.1260     | 2.793                        | 3.286 | 582.163         | 1  | 0.000 |  |
| AO-JFM      | -0.321 | 0.1807     | -0.676                       | 0.033 | 3.163           | 1  | 0.075 |  |
| NAO-JFM     | 0.434  | 0.2692     | -0.093                       | 0.962 | 2.604           | 1  | 0.107 |  |
| MJO-JFM     | 0.002  | 0.3319     | -0.649                       | 0.653 | 0.000           | 1  | 0.995 |  |
| ONI-JFM     | -0.028 | 0.1378     | -0.299                       | 0.242 | 0.043           | 1  | 0.836 |  |
| PDO-JFM     | 0.118  | 0.1775     | -0.230                       | 0.466 | 0.441           | 1  | 0.507 |  |

|          |                   |        |        |       |       |   |       |
|----------|-------------------|--------|--------|-------|-------|---|-------|
| PNA-JFM  | -0.320            | 0.1830 | -0.678 | 0.039 | 3.053 | 1 | 0.081 |
| ASOI-JFM | 0.049             | 0.0598 | -0.068 | 0.166 | 0.680 | 1 | 0.410 |
| (Scale)  | .885 <sup>a</sup> | 0.1734 | 0.603  | 1.299 |       |   |       |

**SEUS May**

| Parameter   | B                 | Std. Error | 95% Wald Confidence Interval |        | Hypothesis Test |         |      |              |
|-------------|-------------------|------------|------------------------------|--------|-----------------|---------|------|--------------|
|             |                   |            | Lower                        | Upper  | Wald Chi-Square | df      | Sig. |              |
| (Intercept) | 2.740             | 0.1357     |                              | 2.474  | 3.006           | 407.388 | 1    | 0.000        |
| AO-FMA      | 0.271             | 0.2213     |                              | -0.163 | 0.705           | 1.498   | 1    | 0.221        |
| NAO-FMA     | 0.223             | 0.3213     |                              | -0.407 | 0.852           | 0.480   | 1    | 0.489        |
| MJO-FMA     | 1.118             | 0.4721     |                              | 0.192  | 2.043           | 5.603   | 1    | <b>0.018</b> |
| ONI-FMA     | -0.348            | 0.2063     |                              | -0.752 | 0.057           | 2.841   | 1    | 0.092        |
| PDO-FMA     | -0.155            | 0.1726     |                              | -0.493 | 0.184           | 0.804   | 1    | 0.370        |
| PNA-FMA     | 0.661             | 0.2166     |                              | 0.237  | 1.085           | 9.315   | 1    | <b>0.002</b> |
| ASOI-FMA    | 0.230             | 0.0905     |                              | 0.053  | 0.408           | 6.480   | 1    | <b>0.011</b> |
| (Scale)     | .902 <sup>a</sup> | 0.1727     |                              | 0.620  | 1.313           |         |      |              |

Probability Distribution: Tweedie (1.84)

Omnibus Value: **0.001**

a. Maximum likelihood estimate. Link Function: Log

**Table S3.** Parameter estimates for generalized linear models analyzing the relationship between mesoscale > EF0 tornado frequency and seasonal tri-monthly climate index averages. Bold indicates significant values ( $\alpha < 0.05$ ).

| Birmingham                                         |                   |                    |                              |       |                      |    |       |
|----------------------------------------------------|-------------------|--------------------|------------------------------|-------|----------------------|----|-------|
| Parameter                                          | B                 | Std. Error         | 95% Wald Confidence Interval |       | Hypothesis Test      |    |       |
|                                                    |                   |                    | Lower                        | Upper | Wald Chi-Square      | df | Sig.  |
| (Intercept)                                        | -0.197            | 0.615              | -1.402                       | 1.009 | 0.102                | 1  | 0.749 |
| AO                                                 | -0.308            | 0.8692             | -2.012                       | 1.396 | 0.126                | 1  | 0.723 |
| NAO                                                | 0.364             | 1.2759             | -2.137                       | 2.865 | 0.082                | 1  | 0.775 |
| MJO                                                | -0.703            | 1.4478             | -3.541                       | 2.134 | 0.236                | 1  | 0.627 |
| ONI                                                | 0.172             | 0.9844             | -1.758                       | 2.101 | 0.03                 | 1  | 0.861 |
| PDO                                                | -0.355            | 0.5202             | -1.375                       | 0.664 | 0.466                | 1  | 0.495 |
| PNA                                                | 0.403             | 0.6028             | -0.779                       | 1.584 | 0.446                | 1  | 0.504 |
| ASOI                                               | 0.379             | 0.4142             | -0.433                       | 1.191 | 0.838                | 1  | 0.36  |
| (Scale)                                            | 1 <sup>a</sup>    |                    |                              |       |                      |    |       |
| (Negative binomial)                                | 1.25 <sup>a</sup> |                    |                              |       |                      |    |       |
| Probability Distribution: Negative Binomial (1.25) |                   |                    |                              |       | Omnibus Value: 0.634 |    |       |
| a. Maximum likelihood estimate                     |                   | Link Function: Log |                              |       |                      |    |       |

| Cincinnati                                         |                   |                    |                              |       |                      |    |       |
|----------------------------------------------------|-------------------|--------------------|------------------------------|-------|----------------------|----|-------|
| Parameter                                          | B                 | Std. Error         | 95% Wald Confidence Interval |       | Hypothesis Test      |    |       |
|                                                    |                   |                    | Lower                        | Upper | Wald Chi-Square      | df | Sig.  |
| (Intercept)                                        | -0.869            | 0.6384             | -2.12                        | 0.383 | 1.851                | 1  | 0.174 |
| AO                                                 | 0.097             | 1.2373             | -2.328                       | 2.522 | 0.006                | 1  | 0.937 |
| NAO                                                | 1.072             | 1.7486             | -2.355                       | 4.5   | 0.376                | 1  | 0.54  |
| MJO                                                | -1.86             | 3.4339             | -8.59                        | 4.87  | 0.293                | 1  | 0.588 |
| ONI                                                | 0.188             | 1.6593             | -3.064                       | 3.44  | 0.013                | 1  | 0.91  |
| PDO                                                | -0.336            | 0.7751             | -1.855                       | 1.183 | 0.188                | 1  | 0.665 |
| PNA                                                | 0.692             | 1.5495             | -2.345                       | 3.729 | 0.2                  | 1  | 0.655 |
| ASOI                                               | -0.004            | 0.8672             | -1.703                       | 1.696 | 0                    | 1  | 0.997 |
| (Scale)                                            | 1 <sup>a</sup>    |                    |                              |       |                      |    |       |
| (Negative binomial)                                | 1.01 <sup>a</sup> |                    |                              |       |                      |    |       |
| Probability Distribution: Negative Binomial (1.01) |                   |                    |                              |       | Omnibus Value: 0.968 |    |       |
| a. Maximum likelihood estimate                     |                   | Link Function: Log |                              |       |                      |    |       |

| Kansas City |        |            |                              |       |                 |    |       |
|-------------|--------|------------|------------------------------|-------|-----------------|----|-------|
| Parameter   | B      | Std. Error | 95% Wald Confidence Interval |       | Hypothesis Test |    |       |
|             |        |            | Lower                        | Upper | Wald Chi-Square | df | Sig.  |
| (Intercept) | -0.102 | 0.5209     | -1.123                       | 0.919 | 0.038           | 1  | 0.845 |
| AO          | 1.004  | 1.3613     | -1.664                       | 3.672 | 0.544           | 1  | 0.461 |
| NAO         | -0.399 | 1.7614     | -3.851                       | 3.054 | 0.051           | 1  | 0.821 |

|                     |                    |        |        |       |       |   |       |
|---------------------|--------------------|--------|--------|-------|-------|---|-------|
| MJO                 | -0.275             | 3.0527 | -6.258 | 5.709 | 0.008 | 1 | 0.928 |
| ONI                 | -0.15              | 1.5094 | -3.108 | 2.808 | 0.01  | 1 | 0.921 |
| PDO                 | 0.866              | 0.5592 | -0.23  | 1.962 | 2.398 | 1 | 0.121 |
| PNA                 | -0.312             | 0.8578 | -1.993 | 1.37  | 0.132 | 1 | 0.716 |
| ASOI                | 0.255              | 0.8138 | -1.34  | 1.85  | 0.098 | 1 | 0.754 |
| (Scale)             | 1 <sup>a</sup>     |        |        |       |       |   |       |
| (Negative binomial) | 1.001 <sup>a</sup> |        |        |       |       |   |       |

Probability Distribution: Negative Binomial (1.001)

Omnibus Value: 0.682

a. Maximum likelihood estimate

Link Function: Log

#### Moore

| Parameter           | B                 | Std.<br>Error | 95% Wald Confidence<br>Interval |       | Hypothesis Test |    |       |
|---------------------|-------------------|---------------|---------------------------------|-------|-----------------|----|-------|
|                     |                   |               | Lower                           | Upper | Wald Chi-Square | df | Sig.  |
| (Intercept)         | 0.558             | 0.3468        | -0.121                          | 1.238 | 2.593           | 1  | 0.107 |
| AO                  | -0.486            | 0.6896        | -1.838                          | 0.865 | 0.497           | 1  | 0.481 |
| NAO                 | -0.678            | 0.9296        | -2.5                            | 1.144 | 0.531           | 1  | 0.466 |
| MJO                 | -0.775            | 2.112         | -4.914                          | 3.365 | 0.135           | 1  | 0.714 |
| ONI                 | -0.342            | 1.1385        | -2.573                          | 1.89  | 0.09            | 1  | 0.764 |
| PDO                 | 0.084             | 0.4464        | -0.791                          | 0.959 | 0.036           | 1  | 0.85  |
| PNA                 | -0.076            | 0.8117        | -1.667                          | 1.515 | 0.009           | 1  | 0.925 |
| ASOI                | -0.229            | 0.5798        | -1.366                          | 0.907 | 0.156           | 1  | 0.693 |
| (Scale)             | 1 <sup>a</sup>    |               |                                 |       |                 |    |       |
| (Negative binomial) | 1.15 <sup>a</sup> |               |                                 |       |                 |    |       |

Probability Distribution: Negative Binomial (1.15)

Omnibus Value: 0.432

a. Maximum likelihood estimate

Link Function: Log

#### Tanner

| Parameter           | B                  | Std.<br>Error | 95% Wald Confidence<br>Interval |       | Hypothesis Test |    |       |
|---------------------|--------------------|---------------|---------------------------------|-------|-----------------|----|-------|
|                     |                    |               | Lower                           | Upper | Wald Chi-Square | df | Sig.  |
| (Intercept)         | -0.012             | 0.606         | -1.2                            | 1.176 | 0               | 1  | 0.984 |
| AO                  | -0.216             | 0.8936        | -1.968                          | 1.535 | 0.059           | 1  | 0.809 |
| NAO                 | 0.624              | 1.3936        | -2.108                          | 3.355 | 0.2             | 1  | 0.655 |
| MJO                 | -1.695             | 2.1066        | -5.824                          | 2.434 | 0.647           | 1  | 0.421 |
| ONI                 | 2.214              | 1.2791        | -0.293                          | 4.721 | 2.996           | 1  | 0.083 |
| PDO                 | -0.059             | 0.4765        | -0.993                          | 0.875 | 0.015           | 1  | 0.902 |
| PNA                 | -0.754             | 0.9518        | -2.619                          | 1.112 | 0.627           | 1  | 0.429 |
| ASOI                | 0.906              | 0.5655        | -0.202                          | 2.015 | 2.569           | 1  | 0.109 |
| (Scale)             | 1 <sup>a</sup>     |               |                                 |       |                 |    |       |
| (Negative binomial) | 1.001 <sup>a</sup> |               |                                 |       |                 |    |       |

Probability Distribution: Negative Binomial (1.001)

Omnibus Value: 0.614

a. Maximum likelihood estimate

Link Function: Log

**Tuscaloosa**

| <i>Parameter</i> | <i>B</i>            | <i>Std.<br/>Error</i> | <i>95% Wald Confidence<br/>Interval</i> |              | <i>Hypothesis Test</i> |           |             |
|------------------|---------------------|-----------------------|-----------------------------------------|--------------|------------------------|-----------|-------------|
|                  |                     |                       | <i>Lower</i>                            | <i>Upper</i> | <i>Wald Chi-Square</i> | <i>df</i> | <i>Sig.</i> |
| (Intercept)      | -0.466              | 0.1448                | -0.75                                   | -0.182       | 10.364                 | 1         | 0.001       |
| AO               | 3.261               | 0.5058                | 2.27                                    | 4.253        | 41.581                 | 1         | <b>0</b>    |
| NAO              | -2.094              | 0.4355                | -2.948                                  | -1.241       | 23.122                 | 1         | <b>0</b>    |
| MJO              | -2.885              | 0.7802                | -4.414                                  | -1.356       | 13.676                 | 1         | <b>0</b>    |
| ONI              | 1.823               | 0.4491                | 0.943                                   | 2.703        | 16.476                 | 1         | <b>0</b>    |
| PDO              | -0.092              | 0.168                 | -0.421                                  | 0.237        | 0.301                  | 1         | 0.583       |
| PNA              | 1.315               | 0.3649                | 0.6                                     | 2.03         | 12.988                 | 1         | <b>0</b>    |
| ASOI             | 1.355               | 0.2171                | 0.93                                    | 1.781        | 38.955                 | 1         | <b>0</b>    |
| (Scale)          | .099 <sup>a,b</sup> |                       |                                         |              |                        |           |             |

Probability Distribution: Tweedie (1.001)

Omnibus Value: **0.000**

a. Maximum likelihood estimate

Link Function: Log

b. Maximum likelihood estimate.

**Wichita**

| <i>Parameter</i> | <i>B</i>       | <i>Std.<br/>Error</i> | <i>95% Wald Confidence<br/>Interval</i> |              | <i>Hypothesis Test</i> |           |              |
|------------------|----------------|-----------------------|-----------------------------------------|--------------|------------------------|-----------|--------------|
|                  |                |                       | <i>Lower</i>                            | <i>Upper</i> | <i>Wald Chi-Square</i> | <i>df</i> | <i>Sig.</i>  |
| (Intercept)      | -3.666         | 1.2631                | -6.142                                  | -1.19        | 8.423                  | 1         | 0.004        |
| AO               | -1.846         | 0.863                 | -3.538                                  | -0.155       | 4.576                  | 1         | <b>0.032</b> |
| NAO              | 2.046          | 1.0485                | -0.009                                  | 4.101        | 3.807                  | 1         | 0.051        |
| MJO              | -5.365         | 2.7786                | -10.811                                 | 0.081        | 3.728                  | 1         | 0.054        |
| ONI              | -1.185         | 1.1038                | -3.349                                  | 0.978        | 1.153                  | 1         | 0.283        |
| PDO              | -2.713         | 0.9448                | -4.565                                  | -0.862       | 8.249                  | 1         | <b>0.004</b> |
| PNA              | 5.322          | 2.1457                | 1.117                                   | 9.528        | 6.153                  | 1         | <b>0.013</b> |
| ASOI             | -1.481         | 0.6751                | -2.804                                  | -0.158       | 4.815                  | 1         | <b>0.028</b> |
| (Scale)          | 1 <sup>a</sup> |                       |                                         |              |                        |           |              |

Probability Distribution: Poisson

Omnibus Value: **0.000**

a. Maximum likelihood estimate

Link Function: Log
